# Supplementary material for: Physiological and Biochemical Mechanisms of Exogenous Melatonin Regulation of Saline–Alkali Tolerance in Oats
Source: MDPI journal article supplement (doi:10.3390/agronomy13051327), 2023-05-09
Supplement: s1 [file s1]

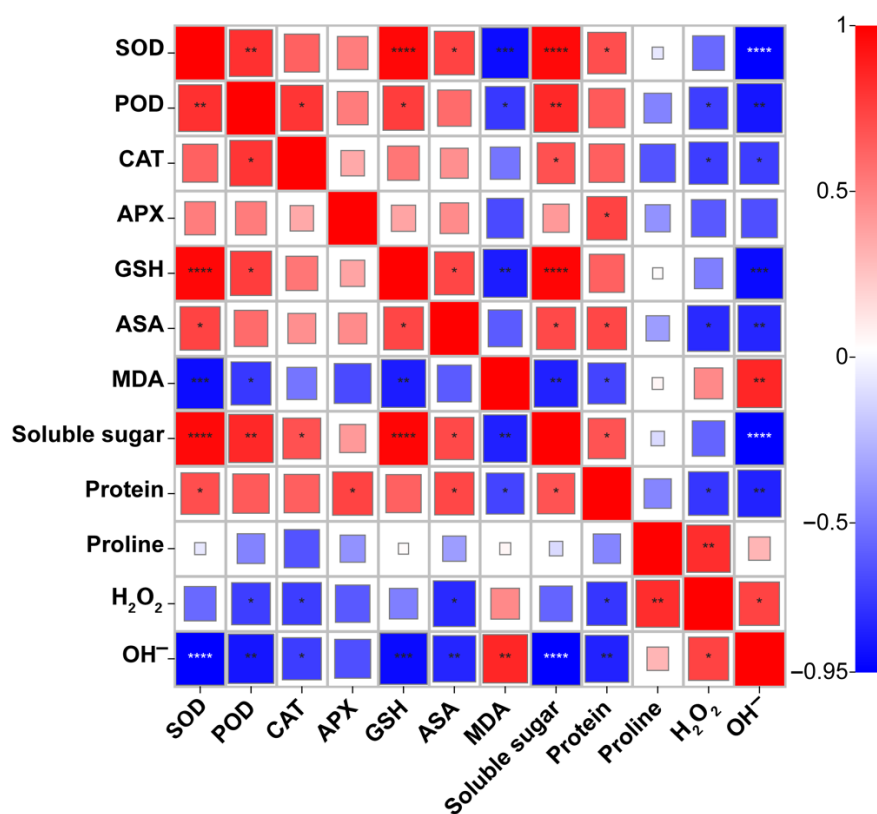

**Figure S1.** Correlation analysis of MT seed soaking treatments on physiological indicators of oats 1 d after saline-alkali stress. \*\*\*\*, \*\*\*, \*\*highly significant ( $P \leq 0.01$ ), \*significant ( $P \leq 0.05$ ).

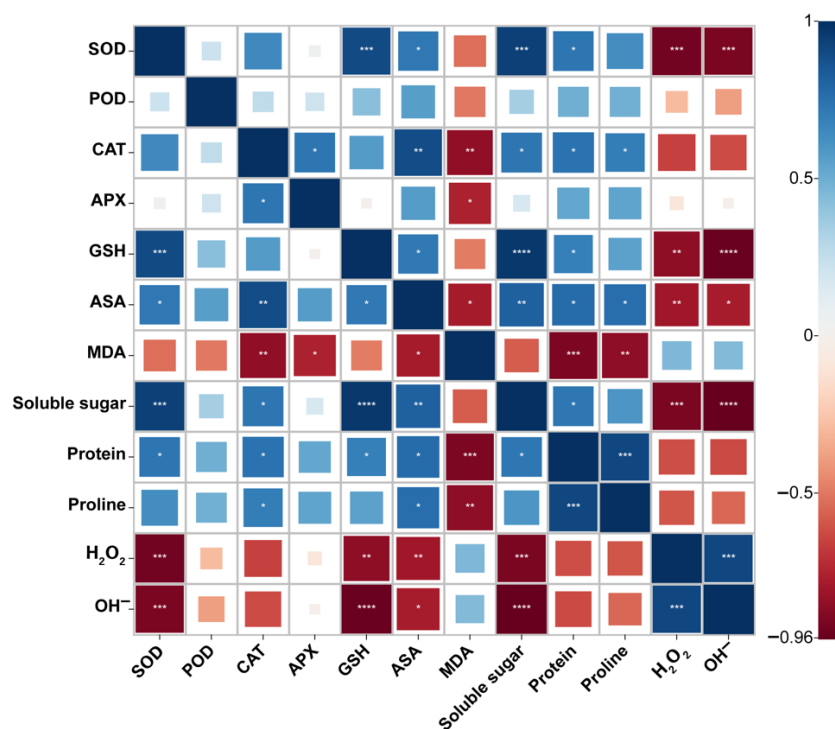

**Figure S2.** Correlation analysis of MT seed soaking treatments on physiological indicators of oats at 3 d after saline-alkali stress. \*\*\*\*, \*\*\*, \*\*highly significant ( $P \leq 0.01$ ), \*significant ( $P \leq 0.05$ ).
