# Supplementary figures and images for: Physiological and Biochemical Mechanisms of Exogenous Melatonin Regulation of Saline–Alkali Tolerance in Oats
Source: MDPI journal article supplement (doi:10.3390/agronomy13051327), 2023-05-09

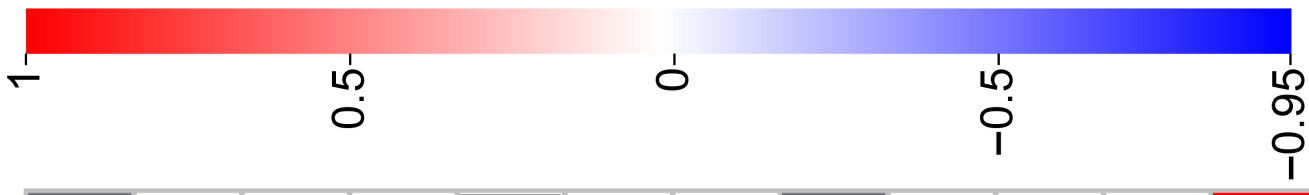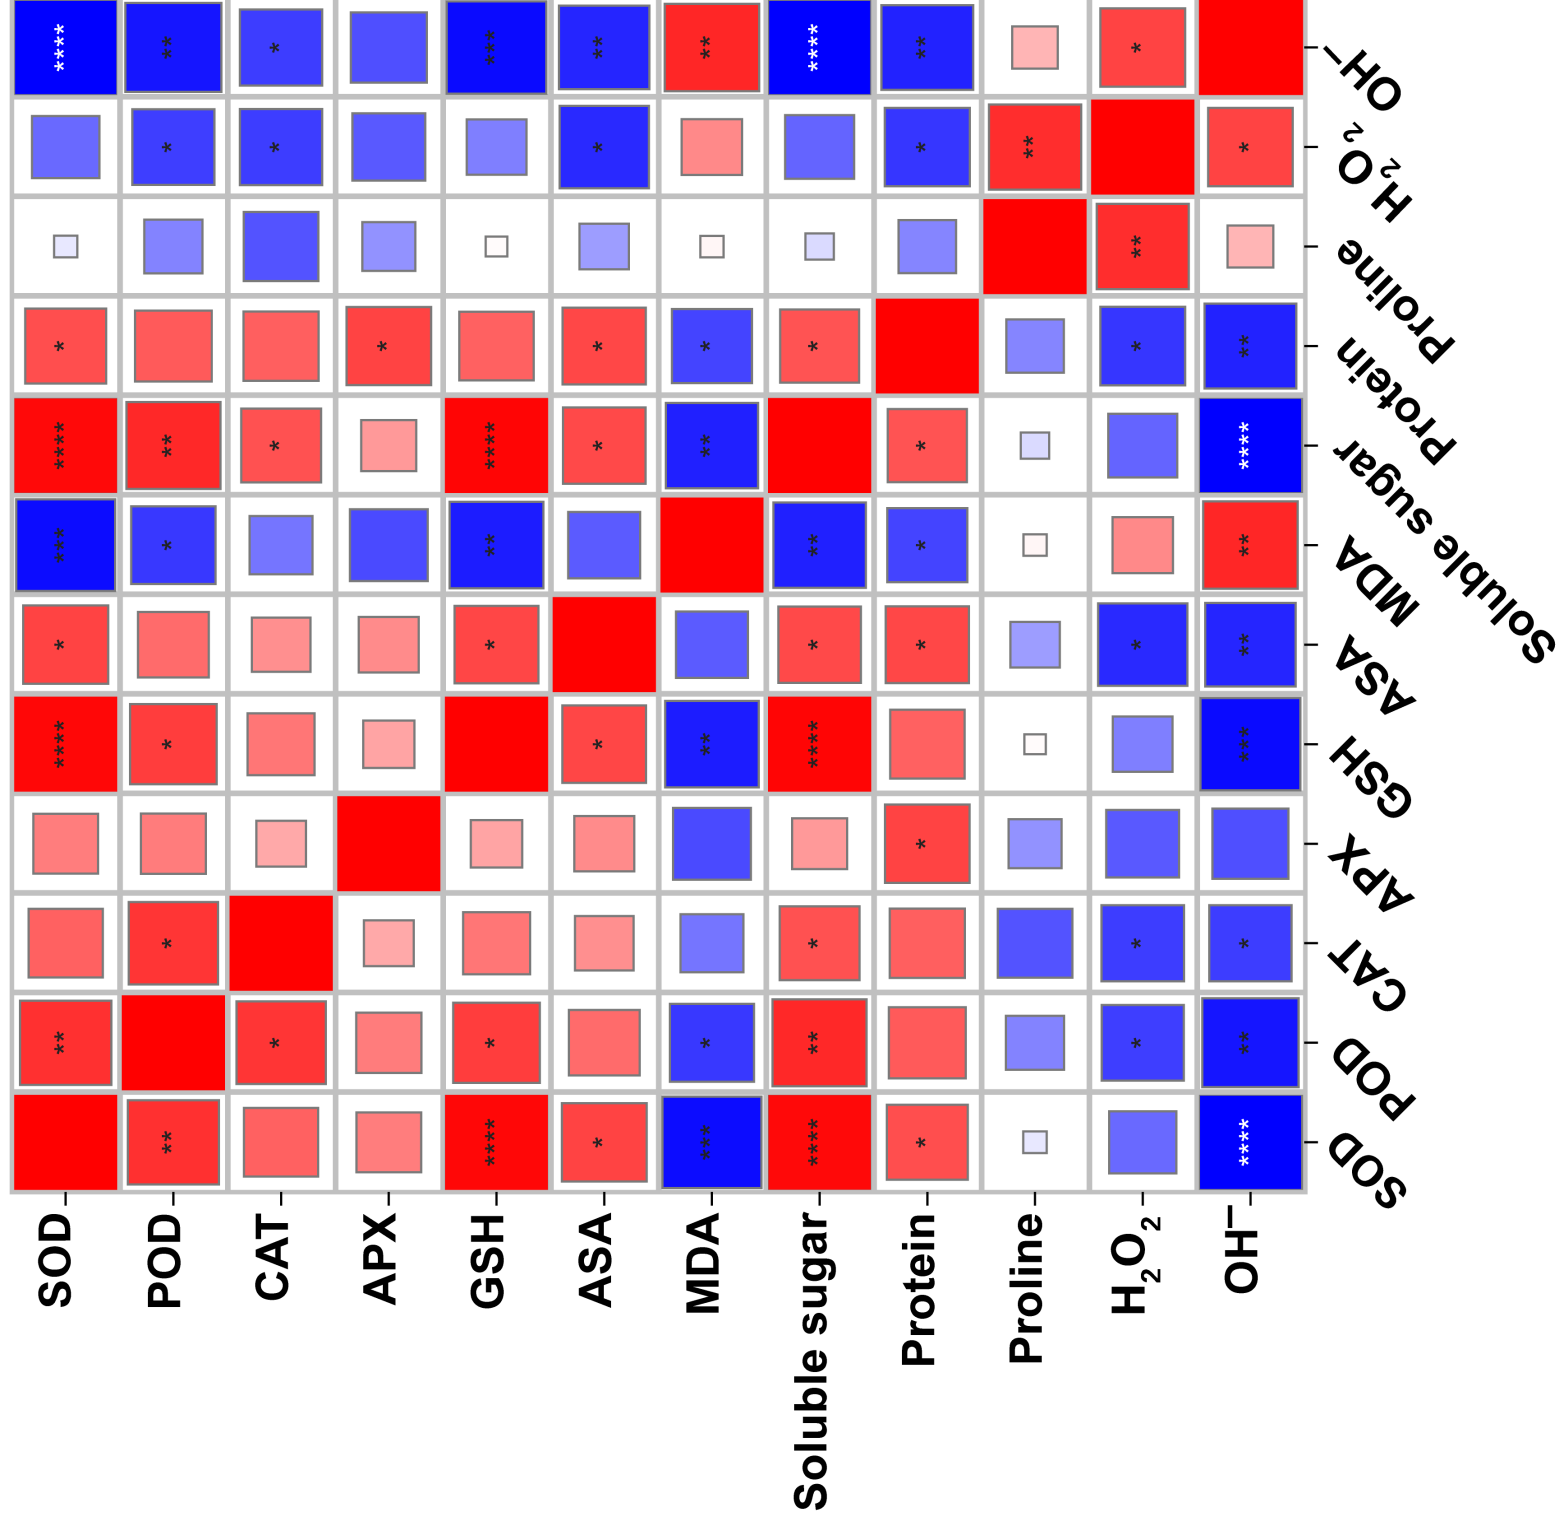

Supplement: s1 [file s1]

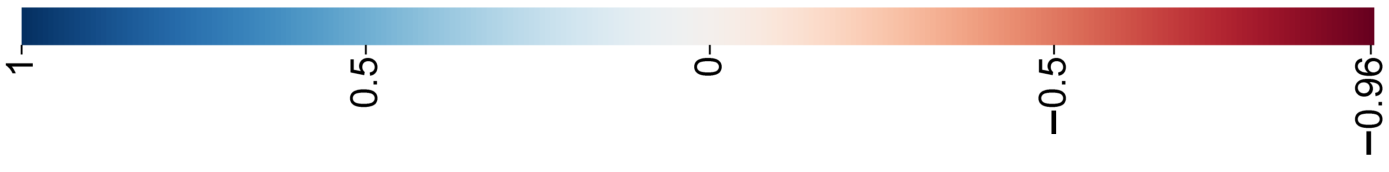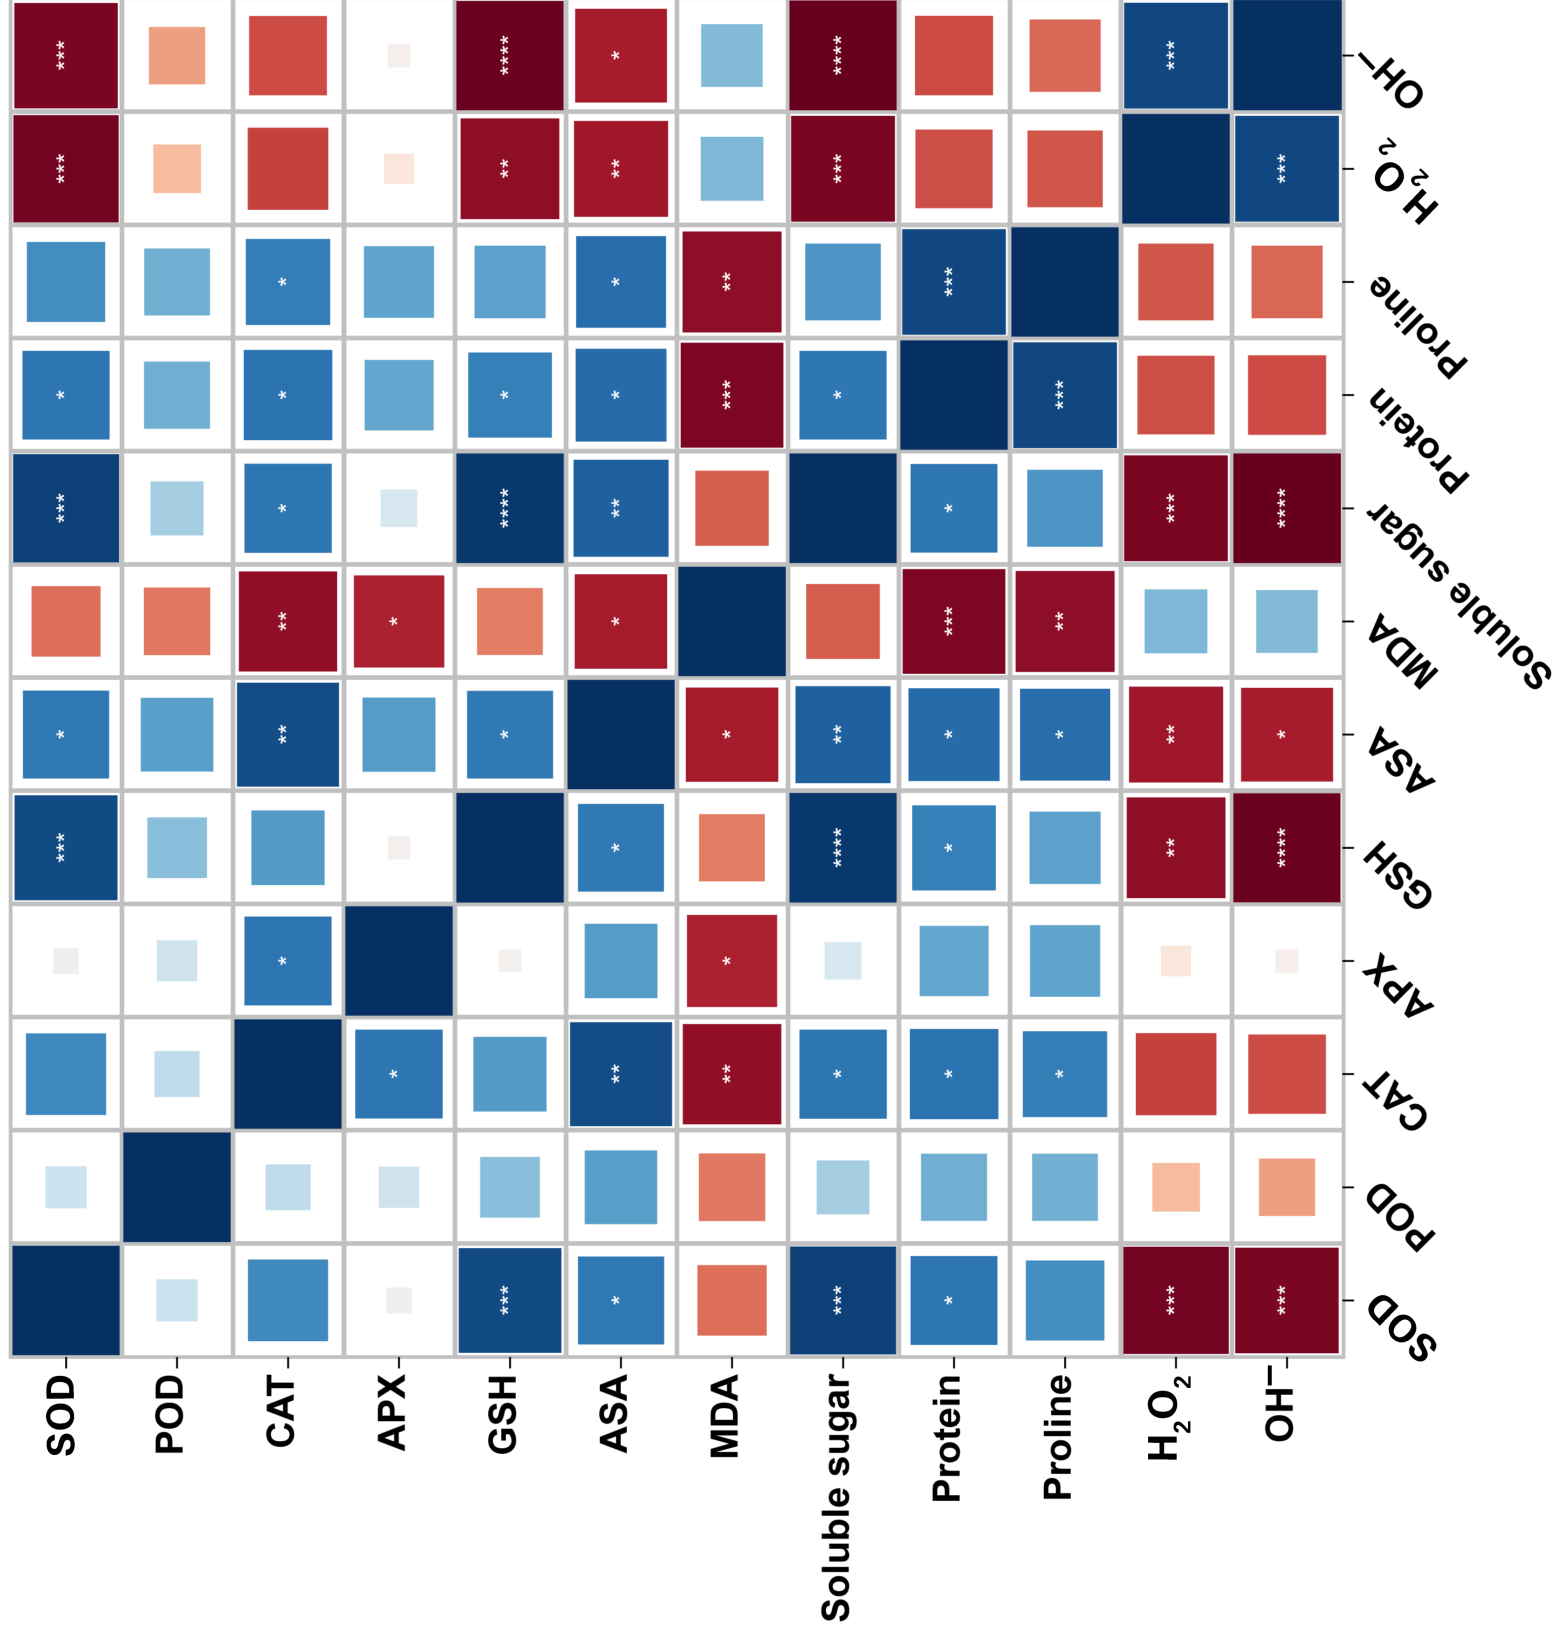

Supplement: s1 [file s1]
